# Supplementary material for: Eye movement desensitization and reprocessing therapy versus supportive therapy in affective relapse prevention in bipolar patients with a history of trauma: study protocol for a randomized controlled trial
Source: Springer Nature journal article supplement (doi:10.1186/s13063-017-1910-y), 2017-04-04

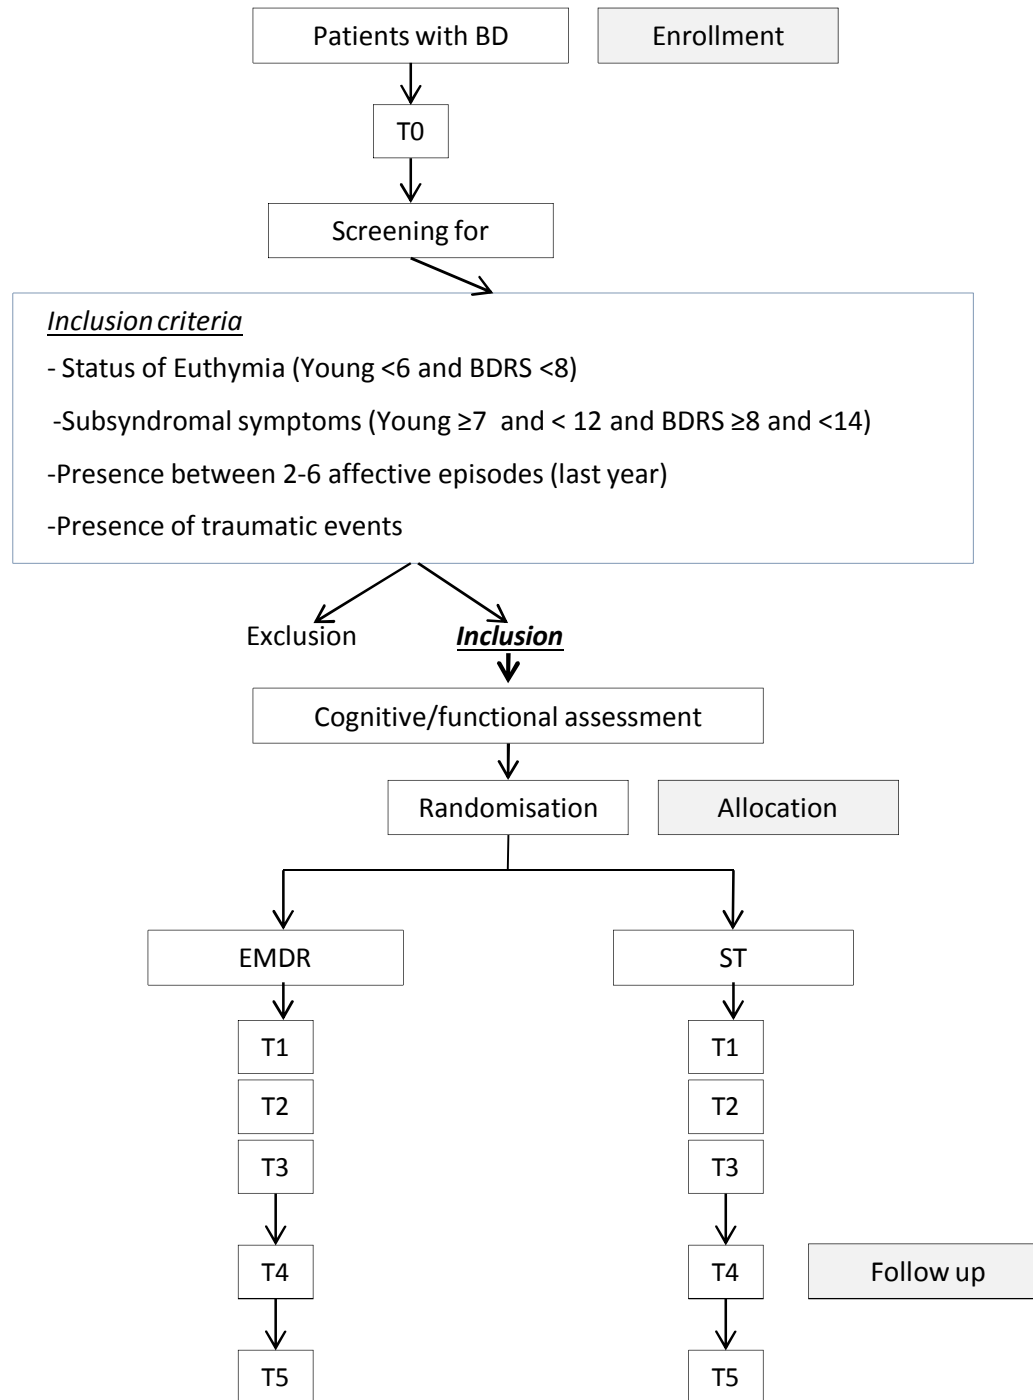

Supplement: MOESM1 [file 12196422]
